# Supplementary material for: Cooperation among c-subunits of FoF1-ATP synthase in rotation-coupled proton translocation
Source: eLife journal article supplement (doi:10.7554/elife.69096), 2021-12-22

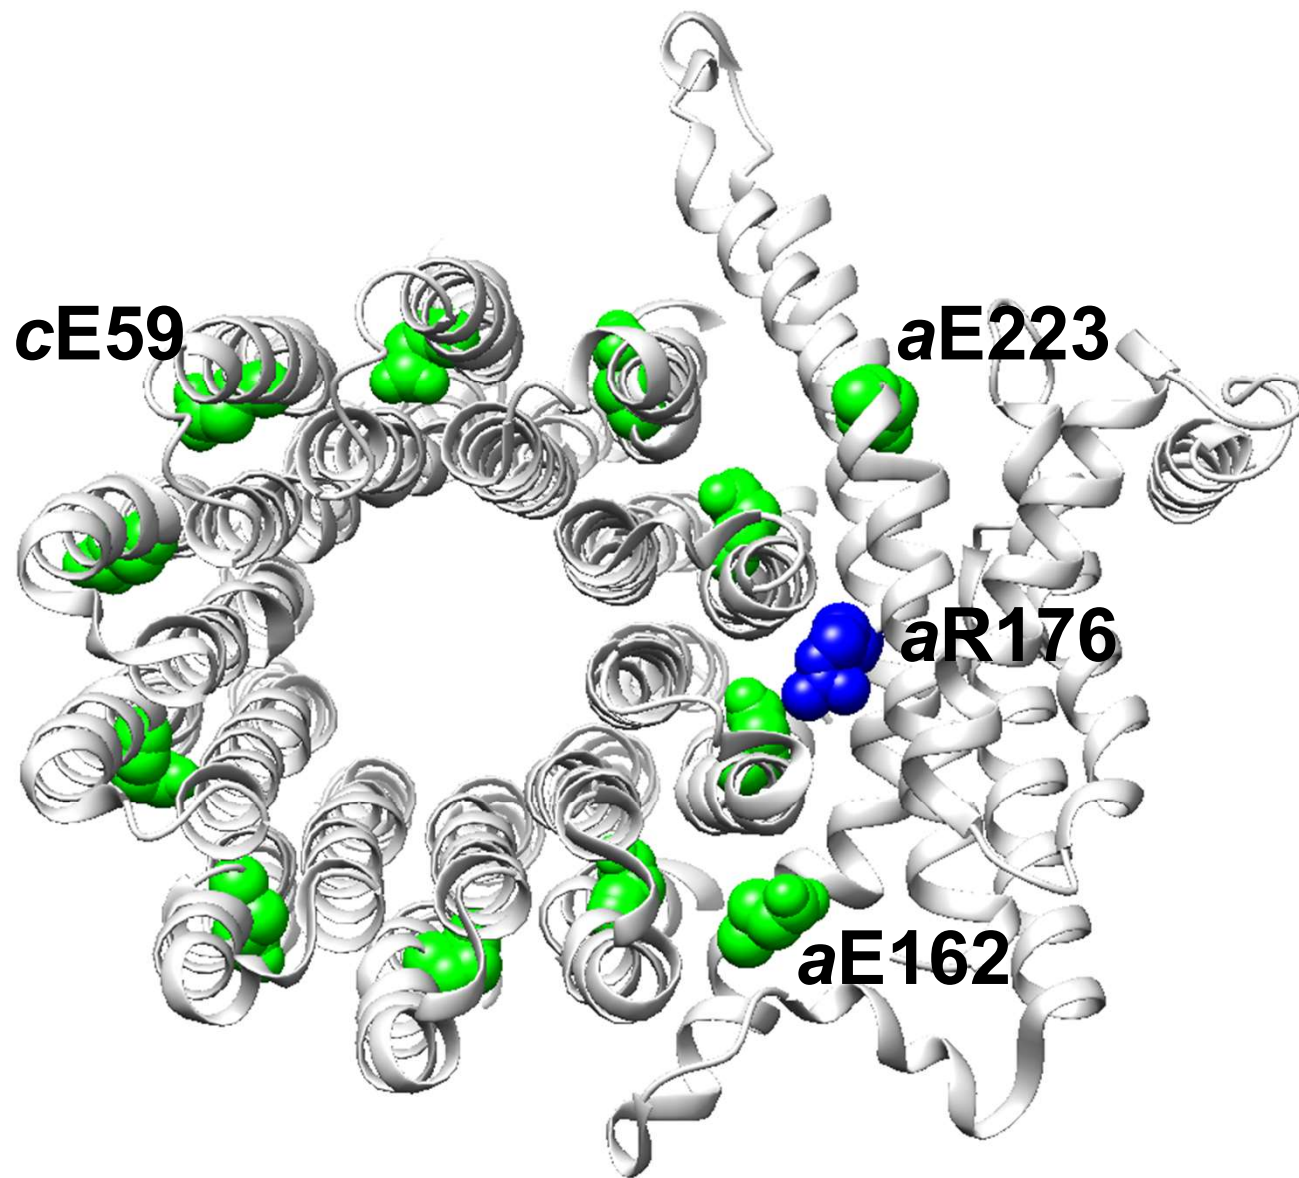

Supplement: fig1-data1 [file elife-69096-fig1-data1-v1.pdf]
