# Supplementary material for: Cooperation among c-subunits of FoF1-ATP synthase in rotation-coupled proton translocation
Source: eLife. 2022 Feb 2;11:e69096. doi: 10.7554/eLife.69096 (PMC8809890; doi:10.7554/eLife.69096)
Supplement: Figure 2—source data 2. [file elife-69096-fig2-data2.xlsx]

## Sheet: Figure 2b
			SD	SE	(SD)²
9	c10	0.0275855	0.00619673	0.00206558	3.83995e-05
9	e	0.00981827	0.0024158	0.000805266	5.83608e-06
10	ef	0.00615185	0.00256825	0.000812153	6.59592e-06
9	eg	0.00517493	0.00244097	0.000813656	5.95833e-06
10	eh	0.00359683	0.00246328	0.000778958	6.06775e-06
10	ei	0.00397164	0.00186634	0.000590187	3.48321e-06
8	ej	0.0033274	0.00129007	0.000456108	1.66428e-06
	E56Q	-0.00038	0.000493196
	e	ef	eg	eh	ei	ej
c10	5.4091e-07	1.08292e-08	6.4422e-09	2.4455e-09	1.8768e-09	1.73285e-08
e		0.00528924	0.00091424	3.5369e-05	1.61136e-05	6.2495e-06
ef			0.408521	0.0356899	0.0434858	0.012159
eg				0.179416	0.241066	0.0751724
eh					0.705834	0.78375
ei						0.419606

## Sheet: figure2b-data source
	/sec	分散/s	/sec				ATP				ATP			ATP synthesis			ATPase in LDAO				ATP synthesis(corrected)			ATP synthesis (3 or 4 times)
	sec										AVERAGE	SD	SE		SD	SE	Average	SD	SE	(e+ef+eg+eh)/4		SD		Average	SD
c10	-0.0248608	0.000136528	0.184263	0.000212806	0.209124	0.0186905	8.53	8.23	9.71	7.94	8.6025	0.776633	0.388316	0.0364645	0.00463233	0.001646	1.08991	0.18252	0.105378	1.00233	0.0335345	0.00704884		0.0330124	0.00682844
c10	-0.0149466	0.000118778	0.199967	0.000126889	0.214914	0.0156738	9.71	9.45	9.73	7.03	8.98	1.30624	0.653121	0.0358987	0.00584144	0.00261093	1.08991	0.18252			0.0330142	0.0077088
c10	-0.0744826	0.000205889	0.678277	0.000263833	0.75276	0.0216731	32.06	31.18	32.28	32.33	31.9625	0.534688	0.267344	0.035327	0.00117634	0.000295486	1.08991	0.18252			0.0324884	0.00554716
														0.0358967	0.00435755
c10	-0.591598	0.000162833	0.150282	0.000168167	0.74188	0.0181934	36.7	30.1	23.1	57.9	36.95	15.0301	7.51504	0.0301169	0.0122728	0.0061253	1.02979	0.0904058			0.0293138	0.0122196		0.0221967	0.00756414
c10	-0.554495	0.000264972	0.0285218	0.000241278	0.583017	0.0225	13	15.4	12.8	11.8	13.25	1.52643	0.763217	0.0165005	0.00200472	0.000950448	1.02979	0.0904058			0.0160605	0.00240737
c10	-0.0131621	0.000138583	0.328322	0.000174528	0.341484	0.0176949	6.5	6.7	4.6	5.7	5.875	0.953502	0.476751	0.0217969	0.00371352	0.0017688	1.02979	0.0904058			0.0212156	0.00406616
														0.0228047	0.00749293
c10	0.0328338	4.6e-05	0.50933	7.2e-05	0.476496	0.0108628	5.506	4.6251	4.5963	4.3324	4.76495	0.511291		0.0375001	0.00411367		1.30054	0.0856561			0.0289016	0.00369798		0.0256117	0.00427918
c10	0.0272	0.000376111	0.3418	0.000835556	0.3146	0.034809	4.51215	3.0758	3.9271	3.4927	3.75194	0.614538		0.0314438	0.00621523		1.30054	0.0856561			0.0242339	0.00504905		0.0269403	0.0063811
c10	0.033	0.000419167	0.4367	0.0011475	0.4037	0.0395811	5.2376	5.5906	4.4325	4.4317	4.9231	0.584987		0.0307504	0.0047372		1.30054	0.0856561			0.0236996	0.00397067
														0.0332314	0.00509877
														0.0306443	0.00580602
e	-0.0311509	0.000169222	0.0197318	0.000163361	0.0508827	0.0182369	8.95	8.33	9.99	9.54	9.2025	0.720896	0.360448	0.00829384	0.00304277	0.000324857	1.05294	0.112099	0.0647202		0.00789521	0.00301602		0.00789925	0.00240656
e	-0.0339289	0.0001915	0.129961	0.000207139	0.16389	0.0199659	42.2	28.8	27	28.9	31.725	7.0377	3.51885	0.00774893	0.00196114	0.00085949	1.05294	0.112099			0.0073765	0.00202533
e	-0.0625896	0.0003375	0.165483	0.000376667	0.228073	0.0267239	41.2	45.7	38.8	28.9	38.65	7.10141	3.5507	0.00885146	0.0019289	0.000813167	1.05294	0.112099			0.00842603	0.0020436
														0.00829808	0.0023682
e	-0.0581044	0.000291389	0.128429	0.000307778	0.186533	0.0244779	29.8	24.1	18.9	39.4	28.05	8.77895	4.38948	0.00997505	0.00338525	0.00156097	1.25519	0.0150427			0.00796558	0.00270498		0.00909859	0.00264947
e	-0.0983003	0.000299167	0.141576	0.00026475	0.239876	0.0237469	35.5	30.8	32.5	25.7	31.125	4.10559	2.05279	0.0115603	0.00190656	0.000762439	1.25519	0.0150427			0.00923149	0.0015265
e	-0.0128322	8.9e-05	0.0721416	8.21667e-05	0.0849738	0.0130831	14.0938	7.4186	10.5678	8.2355	10.0789	2.99075	1.49538	0.0126463	0.00422764	0.00187628	1.25519	0.0150427			0.0100987	0.00337815
														0.0113939	0.00331501
e	-0.0524224	0.000220139	0.169739	0.000191222	0.222161	0.020282	24.4	26	21.8	25	24.3	1.79258	0.896289	0.0137137	0.00160961	0.000505819	1.36115	0.0138066			0.0100985	0.00118971		0.0106132	0.00171881
e	-0.0396347	0.000228333	0.158479	0.000241917	0.198114	0.0216852	21.2	19	16.7	17.5	18.6	1.97821	0.989107	0.0159769	0.00243839	0.000849617	1.36115	0.0138066	0.0117932		0.0117652	0.00179955		0.00920369	0.00229242
e	-0.0584	0.000232889	0.174387	0.000197806	0.232787	0.0207532	30.8	28.9	21.8	21.6	25.775	4.76961	2.3848	0.0135473	0.00278265	0.00125345	1.36115	0.0138066			0.009976	0.0020516
														0.0144126	0.0023295
														0.0113682	0.0027095
ef	-0.0106842	5.375e-05	0.0219177	4.55278e-05	0.0326019	0.00996382	2.03	1.82	1.39	1.7	1.735	0.267395	0.133697	0.00704652	0.00241189	0.000542998	0.990853	0.0204264	0.0117932		0.00712816	0.00244426		0.00649582	0.00226357
ef	-0.0116721	7.15556e-05	0.0169014	4.54444e-05	0.0285735	0.0108167	2.62	1.81	1.75	1.79	1.9925	0.419076	0.209538	0.0053777	0.00232887	0.000565537	0.990853	0.0204264			0.00544	0.00235852
ef	-0.0448245	5.06667e-05	-0.001483	4.70556e-05	0.0433415	0.00988546	2.65	2.5	2.66	1.83	2.41	0.393531	0.196766	0.00674401	0.00189176	0.000550618	0.990853	0.0204264			0.00682214	0.00191884
ef	-0.0334054	6.31111e-05	-0.001687	3.95556e-05	0.0317184	0.0101325	1.57	1.97	2.1	1.66	1.825	0.250932	0.125466	0.00651748	0.00226668	0.000448066	0.990853	0.0204264			0.00659299	0.00229696
														0.00642143	0.00223369
ef	-0.0292048	0.000211639	0.175489	0.000225778	0.204694	0.0209145	53.7236	46.029	32.594	45.519	44.4664	8.75974	4.37987	0.006905	0.00153234	0.000680132	1.16514	0.0236465			0.00594016	0.00132373		0.00576562	0.00193255
ef	-0.0305459	0.000140778	0.150669	0.000118639	0.181215	0.0161064	63.7589	42.0385	27.96	22.564	39.0804	18.3869	9.19345	0.00695547	0.00333036	0.00163624	1.16514	0.0236465	0.0640743		0.00598358	0.00286758
ef	-0.0488662	0.000237333	0.0702213	0.000234667	0.119087	0.0217256	32.6	27.8	26.9	27.1	28.6	2.69444	1.34722	0.00624585	0.00128242	0.000294214	1.16514	0.0236465			0.00537311	0.0011086
														0.00670211	0.00224232
ef	-0.00959352	0.000152556	0.018008	0.000132583	0.0276015	0.0168861	9.6	4.9	5.9	8.2	7.15	2.13931	1.06966	0.00579053	0.00394351	0.000866277	0.965104	0.0637427			0.0060139	0.00411484		0.00619413	0.00330595
ef	0.0181097	0.000258639	0.0906507	0.000316389	0.072541	0.0239797	18.3	17.3	12.9	17	16.375	2.3824	1.1912	0.00664498	0.00239996	0.000483389	0.965104	0.0637427			0.00690131	0.00253387		0.00615185	0.00256825
ef	-0.0584342	0.000329444	0.0131393	0.000184556	0.0715735	0.0226716	15.5	11.4	31.2	20.6	19.675	8.55546	4.27773	0.00545668	0.00293558	0.00118639	0.965104	0.0637427			0.00566717	0.00307171
														0.00596406	0.00315852
														0.00636253	0.00258157
eg	-0.024309	5.58333e-05	-0.0018962	4.54722e-05	0.0224128	0.0100651	1.45	1.82	1.48	1.2	1.4875	0.254738	0.127369	0.00565029	0.00271565	0.000483813	1.00238	0.128149	0.0640743		0.00565005	0.00280996		0.00605107	0.00291247
eg	-0.0141978	2.31056e-05	-0.000946	3.51667e-05	0.0132518	0.00763362	0.822	0.995	0.496	0.697	0.7525	0.210166	0.105083	0.00660389	0.00422767	0.0009222	1.00238	0.128149			0.00660361	0.00431097
eg	-0.0352406	5.05556e-05	-0.002294	3.25278e-05	0.0329466	0.00911501	2.52	2.03	1.91	1.63	2.0225	0.371607	0.185803	0.00610876	0.00202881	0.000561201	1.00238	0.128149			0.0061085	0.00217384
eg	-0.0628407	5.875e-05	-0.01283	4.36389e-05	0.0500107	0.0101187	3.8	3.34	3.04	2.66	3.21	0.481802	0.240901	0.00584237	0.00147184	0.000438453	1.00238	0.128149			0.00584212	0.00165044
														0.00605133	0.0028076
eg	-0.0301672	0.000173694	0.0106298	0.000158611	0.040797	0.0182292	20.3	19.2	19.7	8.1	16.825	5.83402	2.91701	0.00363718	0.00205714	0.000630591	0.845048	0.0285902			0.00431415	0.00244439		0.00490253	0.00210073
eg	-0.060731	0.000214	-0.00206827	0.000227667	0.0586627	0.0210159	22.4	22.5	23.5	19.8	22.05	1.58008	0.790042	0.00399066	0.00145797	0.000142984	0.845048	0.0285902			0.00473342	0.00173673
eg	-0.0432157	0.000279722	0.0267717	0.000258639	0.0699874	0.0232026	26	23.2	19.8	19	22	3.22903	1.61452	0.00477187	0.0017301	0.000350194	0.845048	0.0285902			0.00566003	0.00206103
														0.00461276	0.00176548
eg	-0.0173093	0.000116028	0.0452811	0.000120972	0.0625904	0.0153948	22.5009	17.9305	17.8795	16.0889	18.5999	2.738	1.369	0.00504763	0.00144688	0.000371518	1.08157	0.100416			0.00467782	0.00140946		0.0045712	0.00223147
eg	-0.0111585	0.000112806	0.0182284	0.000119639	0.0293869	0.0152461	13.3	9	8.8	5.5	9.15	3.19844	1.59922	0.00481752	0.00301375	0.000841997	1.08157	0.100416			0.00446458	0.00282354		0.00517493	0.00244097
														0.00493258	0.00236391
														0.00519889	0.00235142
eh	-0.0060227	5.18611e-05	0.00916634	4.28333e-05	0.015189	0.00973111	1.59	1.59	1.08	0.58	1.21	0.483942	0.241971	0.00470735	0.00355526	0.000941357	0.963163	0.0205151	0.0118444		0.00489879	0.00370132		0.00516379	0.0031532
eh	-0.0245186	4.025e-05	-0.001845	3.13333e-05	0.0226736	0.00846069	1.86	1.48	1.54	1.06	1.485	0.328786	0.164393	0.00572566	0.00248432	0.000633843	0.963163	0.0205151			0.00595851	0.00258846
eh	-0.0193818	3.29444e-05	-0.003951	2.80278e-05	0.0154308	0.00780847	1.61	1.31	1.1	1.26	1.32	0.213073	0.106536	0.00438375	0.00232844	0.00035381	0.963163	0.0205151			0.00456203	0.00242508
eh	-0.0089985	2.90556e-05	0.0038479	3.21389e-05	0.0128464	0.00782269	1.08	0.99	1.27	0.49	0.9575	0.332804	0.166402	0.00503123	0.00352766	0.000874366	0.963163	0.0205151			0.00523584	0.00367282
														0.004962	0.00302811
eh	-0.0277089	0.000207444	-0.00020156	0.00019325	0.0275073	0.0200174	33.2781	28.101	23.827	21.916	26.7805	5.04477	2.52238	0.00246514	0.00185303	0.000232184	0.90977	0.0246319			0.00271595	0.00204289		0.00291487	0.00170105
eh	-0.0393128	0.000206306	0.00291348	0.000182222	0.0422263	0.0197111	24.1	16.9	18	29.6	22.15	5.89039	2.94519	0.00285957	0.00153625	0.000380225	0.90977	0.0246319			0.00315051	0.00169471
eh	-0.0410581	0.000195444	0.00404863	0.000195639	0.0451067	0.0197758	24.2	24.9	26.4	28.1	25.9	1.73013	0.865063	0.00261236	0.00115854	8.72531e-05	0.90977	0.0246319			0.00287815	0.00127879
														0.00264569	0.00154229
eh	-0.0134617	0.000147583	0.00955402	0.000141361	0.0230157	0.0169984	22.3	18.6	18.6	12.5	18	4.06038	2.03019	0.00191798	0.00148113	0.000216325	0.713215	0.0246319			0.00271595	0.00204289		0.00271182	0.00231669
eh	-0.0126024	0.000132472	0.0109872	0.000123333	0.0235896	0.0159939	44.4	29.5	22.8	16.1	28.2	12.1065	6.05324	0.00200763	0.00161111	0.000430944	0.713215	0.0246319			0.00282146	0.0022663		0.00359683	0.00246328
eh	-0.00929363	0.000111139	0.00711331	0.000109944	0.0164069	0.0148689	33.5	22.9	15.7	13.1	21.3	9.12871	4.56435	0.00184867	0.00185326	0.000396149	0.713215	0.0246319			0.00259807	0.00260607
														0.00192476	0.0016557
														0.00317748	0.00218246
ei	-0.0432148	4.68889e-05	-0.00103359	5.00556e-05	0.0421812	0.00984604	4.49	4.24	3.99	2.89	3.9025	0.705189	0.352595	0.00405329	0.0011965	0.000366218	0.860402	0.0987832	0.0493916		0.00472191	0.00149559		0.00496746	0.00171806
ei	-0.0406922	0.000103806	-0.00176141	6.91944e-05	0.0389308	0.0131529	3.73	3.22	3.47	3.37	3.4475	0.214534	0.107267	0.00423468	0.00145477	0.00013176	0.860402	0.0987832			0.00493322	0.00178689
ei	-0.0382637	7.08611e-05	0.00951733	6.35e-05	0.047781	0.0115914	4.73	4.46	3.4	3.46	4.0125	0.682025	0.341013	0.00446552	0.00132276	0.000379513	0.860402	0.0987832			0.00520214	0.00165265
ei	-0.033207	5.94444e-05	0.00480097	4.99444e-05	0.038008	0.0104589	4.43	3.29	2.74	2.79	3.3125	0.785297	0.392649	0.00430279	0.00156284	0.000510033	0.860402	0.0987832			0.00501257	0.00190943
														0.00426407	0.00139105
ei	0.0227998	0.000223472	0.0685463	0.000230611	0.0457465	0.0213092	18	17.2	15.1	15.7	16.5	1.33417	0.667083	0.00415877	0.00196617	0.000168136	1.05579	0.0599058			0.0039482	0.00188002		0.00362959	0.00175206
ei	-0.0670702	0.000252556	0.00502424	0.000237667	0.0720944	0.022141	35.3	27.2	22.2	23.5	27.05	5.89378	2.94689	0.00399784	0.00150539	0.000435535	1.05579	0.0599058			0.00379542	0.0014453
ei	-0.0781471	0.000195139	-0.027405	0.000214028	0.0507421	0.0202279	34.9	28.2	15	13.8	22.975	10.2841	5.14204	0.00331287	0.00198573	0.000741455	1.05579	0.0599058			0.00314513	0.00189362
														0.00393339	0.00183259
ei	-0.0114311	0.000118972	0.00912501	0.00011425	0.0205561	0.0152716	17.4	12.3	9	8.3	11.75	4.1509	2.07545	0.00262418	0.00215875	0.000463521	1.05955	0.067289			0.00248247	0.00204825		0.00331788	0.00210432
ei	-0.0735185	0.000199806	0.00260921	0.0001665	0.0761277	0.0191391	35.7	27.2	30.7	23	29.15	5.383		0.00391738	0.00122199	0	1.05955	0.067289			0.00370583	0.00117971		0.00397164	0.00186634
ei	-0.0116906	9.52222e-05	0.0118595	0.0001105	0.0235501	0.014343	13.9	9.1	6.8	5.7	8.875	3.63719	1.8186	0.0039803	0.0029219	0.000815612	1.05955	0.067289			0.00376535	0.00277443
														0.00361381	0.00221292
														0.00393709	0.00184304
ej	-0.015543	4.03611e-05	0.001004	4.06111e-05	0.016547	0.00899846	2.6	2.2	2.3	2.3	2.35	0.173205	0.0866025	0.00264048	0.00144905	9.73073e-05	0.721087	0.022779	0.0131515		0.00367035	0.00201756		0.00471506	0.0021121
ej	-0.04298	5.10833e-05	-0.009246	4.07222e-05	0.033734	0.00958152	4.54	4.03	3.06	2.36	3.4975	0.975649	0.487825	0.00361694	0.00143994	0.000504484	0.721087	0.022779			0.00502766	0.00200785
ej	-0.0246605	4.23611e-05	0.0017779	3.53056e-05	0.0264384	0.00881287	3.15	2.85	2.47	1.65	2.53	0.649307	0.324654	0.00391874	0.00164857	0.000502858	0.721087	0.022779			0.00544716	0.00229801
														0.00339205	0.00151558
ej	0.00619984	0.000204389	0.0347976	0.000207528	0.0285978	0.0202957	11.6	12.5	10.1	10.3	11.125	1.13248	0.566238	0.00385588	0.000392511	0.000196256	0.894488	0.0358518			0.00432077	0.000472701		0.00359754	0.000569229
ej	-0.0356065	0.000225306	0.00391824	0.000219583	0.0395247	0.0210924	27.7	22.8	21.9	21.5	23.475	2.86865	1.43433	0.00252554	0.000308622	0.000154311	0.894488	0.0358518			0.00283004	0.000363959
ej	-0.106723	0.000301944	-0.0302945	0.000270056	0.0764285	0.0239165	31.4	43.6	27	39.1	35.275	7.47055	3.73528	0.00324997	0.00068828	0.00034414	0.894488	0.0358518			0.00364181	0.000784955
														0.00325586	0.000490932
ej	-0.0631076	0.000239972	-0.0263566	0.000188389	0.036751	0.0206969	52.1	36.5	29	33.1	37.675	10.0937	5.04684	0.00146321	0.000392016	0.000196008	0.757437	0.0102719			0.0019363	0.000519427		0.0016696	0.000455925
ej	-0.0245537	0.000209028	-0.00882843	0.000159028	0.0157253	0.0191848	27.6	26.8	14.9	19.7	22.25	6.05117	3.02559	0.00106013	0.000288316	0.000144158	0.757437	0.0102719			0.00140289	0.000382009		0.0033274	0.00129007
														0.00126167	0.000344095
														0.00263653	0.000940991

## Sheet: ef-ei Regression Analysis
SUMMARY OUTPUT
Regression Statistics
Multiple R	0.412795
R Square	0.1704
Adusted R Square	0.151964
Standared Error	1.29387
Obserations	47
ANOVA
	df	SS	MS	F	Significance F
Regression	1	15.4737	15.4737	9.24299	0.00393173
Residual	45	75.3348	1.67411
Total	46	90.8085
	coefficients	Std. Error	t	P-value	Lower 95%	Upper 95%	Lower 95%	Upper 95%
切片	4.03266	0.407055	9.9069	6.96528e-13	3.2128	4.85251	3.2128	4.85251
X 値 1	-244.895	80.5515	-3.04023	0.00393173	-407.134	-82.6559	-407.134	-82.6559

## Sheet: ef-ei 1-5 Sample from mean&SD 
1	0.0104922
1	0.00882284
1	0.00789827
1	0.00689665
1	0.00648573
1	0.00581798
1	0.00540706
1	0.00440544
1	0.00348087
1	0.00181151
2	0.00908048
2	0.0076159
2	0.00661511
2	0.00591455
2	0.00517493
2	0.00443532
2	0.00373476
2	0.00273396
2	0.00126938
3	0.00775977
3	0.00615864
3	0.00527186
3	0.00431118
3	0.00391705
3	0.0032766
3	0.00288248
3	0.0019218
3	0.00103502
3	-0.000566117
4	0.00713306
4	0.00591865
4	0.00524605
4	0.0045174
4	0.00421847
4	0.0037327
4	0.00343377
4	0.00270512
4	0.00203252
4	0.000818112
5	0.00533991
5	0.00447556
5	0.00395953
5	0.00356606
5	0.00308873
5	0.00269526
5	0.00217923
5	0.00131489
