# Supplementary figures and images for: Cooperation among c-subunits of FoF1-ATP synthase in rotation-coupled proton translocation
Source: eLife journal article supplement (doi:10.7554/elife.69096), 2021-12-22

WT c<sub>10</sub> e ef eg eh ei ej

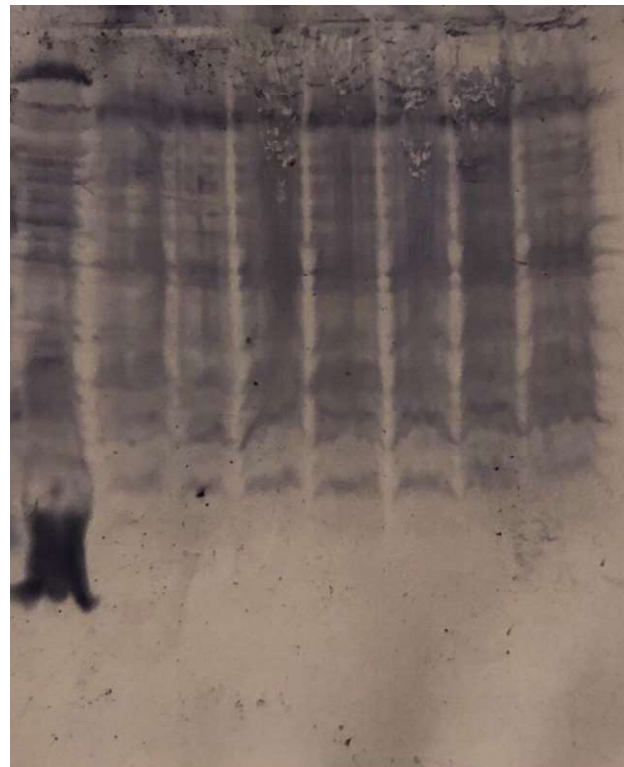

◀ c<sub>10</sub>

◀ c<sub>1</sub>

Supplement: fig2-data1 [file Figure 2-Sorce Data 2.pdf › Figure 2-Sorce Data 2/Figure 2-Sorce Data 2.pdf]
